# Supplementary material for: Modeling microbial cross-feeding at intermediate scale portrays community dynamics and species coexistence
Source: PubMed Central journal article supplement (PMC7480867; doi:10.1371/journal.pcbi.1008135), 2020-08-18
Supplement: pcbi.1008135.s012.pdf [file pcbi.1008135.s012.pdf]

| Parameter   | Unit   | Default value          | Literature                               | MCMC (Q1)              | MCMC (Q2)              | MCMC (Q3)              | MCMC (95% CI)                    |
|-------------|--------|------------------------|------------------------------------------|------------------------|------------------------|------------------------|----------------------------------|
| $V_{1,g}$   | mmol/h | $5.52 \times 10^{-13}$ | $2.99 \times 10^{-14}$ (Ref. [1])        | $3.92 \times 10^{-13}$ | $4.64 \times 10^{-13}$ | $5.48 \times 10^{-13}$ | $[4.808, 4.825] \times 10^{-13}$ |
| $V_{3,g}$   | mmol/h | $6.28 \times 10^{-13}$ | $4.43 \times 10^{-14}$ (Ref. [1])        | $4.42 \times 10^{-13}$ | $5.24 \times 10^{-13}$ | $6.17 \times 10^{-13}$ | $[5.427, 5.445] \times 10^{-13}$ |
| $K_g$       | mM     | $1.00 \times 10^{-2}$  | $1.00 \times 10^{-2}$ (Ref. [1] *)       |                        |                        |                        |                                  |
| $I_{1,a}$   | mM     | $2.63 \times 10^1$     | $4.00 \times 10^1$ (Ref. [2])            | $3.31 \times 10^1$     | $3.91 \times 10^1$     | $4.84 \times 10^1$     | $[4.263, 4.281] \times 10^1$     |
| $I_{3,a}$   | mM     | $1.13 \times 10^2$     | $1.00 \times 10^2$ (Ref. [2])            | $1.39 \times 10^2$     | $1.98 \times 10^2$     | $3.57 \times 10^2$     | $[4.642, 4.772] \times 10^2$     |
| $C_{1,g}$   | mM     | $8.70 \times 10^{-1}$  | $1.18 \times 10^1$ (Ref. [3])            | $3.17 \times 10^{-1}$  | 1.23                   | 4.78                   | $[1.261, 1.319] \times 10^1$     |
| $V_{1,a}$   | mmol/h | $4.26 \times 10^{-13}$ | $1.26 \times 10^{-13}$ (Ref. [1])        | $2.51 \times 10^{-13}$ | $3.45 \times 10^{-13}$ | $5.23 \times 10^{-13}$ | $[4.266, 4.299] \times 10^{-13}$ |
| $K_{1,a}$   | mM     | $2.00 \times 10^{-1}$  | $2.00 \times 10^{-1}$ (Ref. [1] *)       |                        |                        |                        |                                  |
| $\gamma_a$  | 1/mmol | $2.00 \times 10^{11}$  | $[0.67, 1.00] \times 10^{11}$ (Ref. [4]) | $1.90 \times 10^{11}$  | $2.31 \times 10^{11}$  | $2.92 \times 10^{11}$  | $[2.454, 2.463] \times 10^{11}$  |
| $\varphi_a$ |        | $3.30 \times 10^{-1}$  |                                          | $2.98 \times 10^{-1}$  | $3.67 \times 10^{-1}$  | $4.46 \times 10^{-1}$  | $[3.749, 3.763] \times 10^{-1}$  |
| $\delta_a$  |        | 3.00                   | Constant (*)                             |                        |                        |                        |                                  |

**Supplementary Table 1: Estimated parameter values for the simplified unilateral cross-feeding model.** The column "Default value" are the parameter values obtained through manual fitting and used in all simulations. The column "Literature" lists values reported in literature. A literature value is marked with "\*" if the corresponding parameter is constrained to be equal to this value during parameter fitting processes. The columns "MCMC (Q1)", "MCMC (Q2)", "MCMC (Q3)" and "MCMC (95% CI)" are the 25% percentile, 50% percentile (median), 75% percentile and 95% confidence interval of their posterior distributions sampled by Markov-Chain-Monte-Carlo algorithm. To convert units of  $V_{1,g}$ ,  $V_{3,g}$ ,  $V_{1,a}$ , and  $\gamma_a$  from their original data, we assume  $3 \times 10^{-13}$  g dry mass per cell. We chose  $\delta_a = 3$ , which conserves carbon in the production of acetate from glucose. The "carbon conservation" choice may not reflect the actual stoichiometry in cells: one molecule of glucose can also be fermented to produce 2 molecules of acetate and 2 molecules of carbon dioxide (in this case,  $\delta_a = 2$ ). But most importantly, the different choices of  $\delta_a$  would not alter model behavior because it can be absorbed into  $V_{1,g}$  and  $V_{3,g}$  as a scaling factor.

## References

- [1] R Frank Rosenzweig, RR Sharp, David S Treves, and Julian Adams. Microbial evolution in a simple unstructured environment: genetic differentiation in *Escherichia coli*. *Genetics*, 137(4):903–917, 1994.
- [2] Ivana Gudelj, Margie Kinnersley, Peter Rashkov, Karen Schmidt, and Frank Rosenzweig. Stability of cross-feeding polymorphisms in microbial communities. *PLoS computational biology*, 12(12):e1005269, 2016.
- [3] Emmanuel Anane, Peter Neubauer, M Nicolas Cruz Bournazou, et al. Modelling overflow metabolism in *Escherichia coli* by acetate cycling. *Biochemical Engineering Journal*, 125:23–30, 2017.
- [4] Brice Enjalbert, Pierre Millard, Mickael Dinclaux, Jean-Charles Portais, and Fabien Létisse. Acetate fluxes in *Escherichia coli* are determined by the thermodynamic control of the Pta-AckA pathway. *Scientific Reports*, 7:42135, 2017.
