# Supplementary material for: Modeling microbial cross-feeding at intermediate scale portrays community dynamics and species coexistence
Source: PubMed Central journal article supplement (PMC7480867; doi:10.1371/journal.pcbi.1008135), 2020-08-18
Supplement: pcbi.1008135.s014.pdf [file pcbi.1008135.s014.pdf]

| Parameter         | Unit              | Default value          | Literature                                        |
|-------------------|-------------------|------------------------|---------------------------------------------------|
| $\gamma_c$        | $1/\mu\text{mol}$ | $2.74 \times 10^9$     | $2.74 \times 10^9$ (Ref. <a href="#">1</a> *)     |
| $\gamma_f$        | $1/\mu\text{mol}$ | $1.63 \times 10^{10}$  | $1.63 \times 10^{10}$ (Ref. <a href="#">1</a> *)  |
| $\gamma_g$        | $1/\mu\text{mol}$ | $1.04 \times 10^9$     | $1.04 \times 10^9$ (Ref. <a href="#">1</a> *)     |
| $\gamma_h$        | $1/\mu\text{mol}$ | $1.94 \times 10^{10}$  | $1.94 \times 10^{10}$ (Ref. <a href="#">1</a> *)  |
| $\gamma_i$        | $1/\mu\text{mol}$ | $8.03 \times 10^9$     | $8.03 \times 10^9$ (Ref. <a href="#">1</a> *)     |
| $\gamma_k$        | $1/\mu\text{mol}$ | $5.47 \times 10^9$     | $5.47 \times 10^9$ (Ref. <a href="#">1</a> *)     |
| $\gamma_l$        | $1/\mu\text{mol}$ | $4.63 \times 10^9$     | $4.63 \times 10^9$ (Ref. <a href="#">1</a> *)     |
| $\gamma_m$        | $1/\mu\text{mol}$ | $1.47 \times 10^{10}$  | $1.47 \times 10^{10}$ (Ref. <a href="#">1</a> *)  |
| $\gamma_p$        | $1/\mu\text{mol}$ | $1.37 \times 10^9$     | $1.37 \times 10^9$ (Ref. <a href="#">1</a> *)     |
| $\gamma_r$        | $1/\mu\text{mol}$ | $6.02 \times 10^9$     | $6.02 \times 10^9$ (Ref. <a href="#">1</a> *)     |
| $\gamma_s$        | $1/\mu\text{mol}$ | $3.76 \times 10^8$     | $3.76 \times 10^8$ (Ref. <a href="#">1</a> *)     |
| $\gamma_t$        | $1/\mu\text{mol}$ | $2.01 \times 10^9$     | $2.01 \times 10^9$ (Ref. <a href="#">1</a> *)     |
| $\gamma_w$        | $1/\mu\text{mol}$ | $4.01 \times 10^{10}$  | $4.01 \times 10^{10}$ (Ref. <a href="#">1</a> *)  |
| $\gamma_y$        | $1/\mu\text{mol}$ | $1.63 \times 10^{10}$  | $1.63 \times 10^{10}$ (Ref. <a href="#">1</a> *)  |
| $V_{\Delta c,c}$  | $\mu\text{mol}/h$ | $2.10 \times 10^{-11}$ | $2.10 \times 10^{-11}$ (Ref. <a href="#">1</a> *) |
| $V_{\Delta f,f}$  | $\mu\text{mol}/h$ | $7.00 \times 10^{-12}$ | $7.00 \times 10^{-12}$ (Ref. <a href="#">1</a> *) |
| $V_{\Delta g,g}$  | $\mu\text{mol}/h$ | $1.02 \times 10^{-10}$ | $1.02 \times 10^{-10}$ (Ref. <a href="#">1</a> *) |
| $V_{\Delta h,h}$  | $\mu\text{mol}/h$ | $4.00 \times 10^{-12}$ | $4.00 \times 10^{-12}$ (Ref. <a href="#">1</a> *) |
| $V_{\Delta i,i}$  | $\mu\text{mol}/h$ | $1.15 \times 10^{-10}$ | $1.15 \times 10^{-10}$ (Ref. <a href="#">2</a> *) |
| $V_{\Delta k,k}$  | $\mu\text{mol}/h$ | $5.00 \times 10^{-11}$ | $4.83 \times 10^{-14}$ (Ref. <a href="#">3</a> )  |
| $V_{\Delta l,l}$  | $\mu\text{mol}/h$ | $1.90 \times 10^{-10}$ | $1.90 \times 10^{-10}$ (Ref. <a href="#">2</a> *) |
| $V_{\Delta m,m}$  | $\mu\text{mol}/h$ | $1.76 \times 10^{-10}$ | $4.68 \times 10^{-11}$ (Ref. <a href="#">2</a> )  |
| $V_{\Delta p,p}$  | $\mu\text{mol}/h$ | $9.60 \times 10^{-11}$ | $9.60 \times 10^{-11}$ (Ref. <a href="#">1</a> *) |
| $V_{\Delta r,r}$  | $\mu\text{mol}/h$ | $3.20 \times 10^{-11}$ | $3.69 \times 10^{-11}$ (Ref. <a href="#">4</a> )  |
| $V_{\Delta s,s}$  | $\mu\text{mol}/h$ | $2.80 \times 10^{-10}$ | $2.80 \times 10^{-10}$ (Ref. <a href="#">1</a> *) |
| $V_{\Delta t,t}$  | $\mu\text{mol}/h$ | $2.79 \times 10^{-10}$ | $1.41 \times 10^{-10}$ (Ref. <a href="#">5</a> )  |
| $V_{\Delta w,w}$  | $\mu\text{mol}/h$ | $3.00 \times 10^{-12}$ | $3.00 \times 10^{-12}$ (Ref. <a href="#">1</a> *) |
| $V_{\Delta y,y}$  | $\mu\text{mol}/h$ | $4.00 \times 10^{-12}$ | $4.00 \times 10^{-12}$ (Ref. <a href="#">1</a> *) |
| $K_{\Delta c,c}$  | $\mu\text{M}$     | $4.96 \times 10^{-1}$  | $4.96 \times 10^{-1}$ (Ref. <a href="#">6</a> *)  |
| $K_{\Delta f,f}$  | $\mu\text{M}$     | $7.20 \times 10^{-1}$  | $7.20 \times 10^{-1}$ (Ref. <a href="#">2</a> *)  |
| $K_{\Delta g,g}$  | $\mu\text{M}$     | 3.80                   | 3.80 (Ref. <a href="#">2</a> *)                   |
| $K_{\Delta h,h}$  | $\mu\text{M}$     | $2.60 \times 10^{-2}$  | 1.00 (Ref. <a href="#">4</a> )                    |
| $K_{\Delta i,i}$  | $\mu\text{M}$     | $2.20 \times 10^{-1}$  | 1.22 (Ref. <a href="#">2</a> )                    |
| $K_{\Delta k,k}$  | $\mu\text{M}$     | 5.00                   | 5.00 (Ref. <a href="#">4</a> *)                   |
| $K_{\Delta l,l}$  | $\mu\text{M}$     | 1.07                   | 1.07 (Ref. <a href="#">2</a> *)                   |
| $K_{\Delta m,m}$  | $\mu\text{M}$     | 2.27                   | 2.27 (Ref. <a href="#">2</a> *)                   |
| $K_{\Delta p,p}$  | $\mu\text{M}$     | 2.00                   | 2.00 (Ref. <a href="#">7</a> *)                   |
| $K_{\Delta r,r}$  | $\mu\text{M}$     | $5.00 \times 10^{-2}$  | $2.60 \times 10^{-2}$ (Ref. <a href="#">4</a> )   |
| $K_{\Delta s,s}$  | $\mu\text{M}$     | $7.50 \times 10^{-1}$  | 8.95 (Ref. <a href="#">8</a> )                    |
| $K_{\Delta t,t}$  | $\mu\text{M}$     | $5.40 \times 10^{-1}$  | $3.90 \times 10^{-1}$ (Ref. <a href="#">5</a> )   |
| $K_{\Delta w,w}$  | $\mu\text{M}$     | $9.00 \times 10^{-1}$  | $9.00 \times 10^{-1}$ (Ref. <a href="#">2</a> *)  |
| $K_{\Delta y,y}$  | $\mu\text{M}$     | $3.40 \times 10^{-1}$  | $3.40 \times 10^{-1}$ (Ref. <a href="#">9</a> *)  |
| $\eta_{\Delta c}$ | $1/h$             | $1.50 \times 10^{-1}$  |                                                   |
| $\eta_{\Delta f}$ | $1/h$             | $3.00 \times 10^{-1}$  |                                                   |

|                   |                   |                       |                                                     |
|-------------------|-------------------|-----------------------|-----------------------------------------------------|
| $\eta_{\Delta g}$ | $1/h$             | $2.00 \times 10^{-1}$ |                                                     |
| $\eta_{\Delta h}$ | $1/h$             | $2.00 \times 10^{-1}$ |                                                     |
| $\eta_{\Delta i}$ | $1/h$             | $4.00 \times 10^{-1}$ |                                                     |
| $\eta_{\Delta k}$ | $1/h$             | 0.00                  | $7.32 \times 10^{-2}$ (Ref. <a href="#">3</a> )     |
| $\eta_{\Delta l}$ | $1/h$             | $2.00 \times 10^{-1}$ | $1.00 \times 10^{-4}$ (Ref. <a href="#">3</a> )     |
| $\eta_{\Delta m}$ | $1/h$             | 0.00                  |                                                     |
| $\eta_{\Delta p}$ | $1/h$             | $1.00 \times 10^{-1}$ |                                                     |
| $\eta_{\Delta r}$ | $1/h$             | 0.00                  |                                                     |
| $\eta_{\Delta s}$ | $1/h$             | $7.50 \times 10^{-1}$ |                                                     |
| $\eta_{\Delta t}$ | $1/h$             | $2.00 \times 10^{-1}$ |                                                     |
| $\eta_{\Delta w}$ | $1/h$             | $5.00 \times 10^{-2}$ |                                                     |
| $\eta_{\Delta y}$ | $1/h$             | $1.00 \times 10^{-1}$ |                                                     |
| $\delta_c$        |                   | 2.00                  | Constant (*)                                        |
| $\delta_f$        |                   | 0.67                  | Constant (*)                                        |
| $\delta_g$        |                   | 3.00                  | Constant (*)                                        |
| $\delta_h$        |                   | 1.00                  | Constant (*)                                        |
| $\delta_i$        |                   | 1.00                  | Constant (*)                                        |
| $\delta_k$        |                   | 1.00                  | Constant (*)                                        |
| $\delta_l$        |                   | 1.00                  | Constant (*)                                        |
| $\delta_m$        |                   | 1.20                  | Constant (*)                                        |
| $\delta_p$        |                   | 1.20                  | Constant (*)                                        |
| $\delta_r$        |                   | 1.00                  | Constant (*)                                        |
| $\delta_s$        |                   | 2.00                  | Constant (*)                                        |
| $\delta_t$        |                   | 1.50                  | Constant (*)                                        |
| $\delta_w$        |                   | 0.55                  | Constant (*)                                        |
| $\delta_y$        |                   | 0.67                  | Constant (*)                                        |
| $V_g$             | $\mu\text{mol}/h$ | $3.61 \times 10^{-9}$ | $3.61 \times 10^{-9}$ (Ref. <a href="#">10</a> , *) |
| $K_g$             | $\mu M$           | 1.75                  | 1.75 (Ref. <a href="#">11</a> , *)                  |
| $\gamma_g$        | $1/\mu\text{mol}$ | $3.00 \times 10^8$    | $3.00 \times 10^8$ (Ref. <a href="#">12</a> , *)    |

### Supplementary Table 3: Estimated parameter values for the multilateral cross-feeding model.

The default values of the amino acid leakage fractions ( $\varphi_{\Delta x, z}$ ,  $x, z \in \{c, f, g, h, i, k, l, m, p, r, s, t, w, y\}$ ) are displayed in the main text Fig. 5C. To convert unit of  $V_g$  and  $\gamma_g$  from original data, we assume  $3 \times 10^{-13}$  g dry mass per cell. To convert unit of  $V_{\Delta x, x}$  ( $x \in \{i, k, l, m, r, t\}$ ) from original data, we assume  $1 \times 10^{-12}$  g wet mass per cell and 0.2 pg protein per cell. The other  $V_{\Delta x, x}$  ( $x \in \{c, f, g, h, p, s, w, y\}$ ) values were directly estimated from the measured growth rates [\[1\]](#) of corresponding auxotrophies by multiplying the biomass yields of *E. coli* on these amino acids.  $K_{\Delta k, k}$  and  $K_{\Delta h, h}$  were calculated as the geometric mean of Km values of two active lysine and histidine transport systems respectively. The values of  $\delta_x$  ( $x \in \{c, f, g, h, i, k, l, m, p, r, s, t, w, y\}$ ) were chosen to conserve carbon in the production of amino acids from glucose.

### References

- [1] Michael T Mee, James J Collins, George M Church, and Harris H Wang. Syntrophic exchange in synthetic microbial communities. *Proceedings of the National Academy of Sciences*, 111(20):E2149–E2156, 2014.
- [2] Jeanette R Piperno and Dale L Oxender. Amino acid transport systems in *Escherichia coli* K12. *Journal of Biological Chemistry*, 243(22):5914–5920, 1968.
- [3] Xiaolin Zhang and Jennifer L Reed. Adaptive evolution of synthetic cooperating communities improves growth performance. *PLoS ONE*, 9(10):e108297, 2014.
- [4] Yeheskel S Halpern. Genetics of amino acid transport in bacteria. *Annual Review of Genetics*, 8(1):103–133, 1974.
- [5] Bonnie A Templeton and Michael A Savageau. Transport of biosynthetic intermediates: homoserine and threonine uptake in *Escherichia coli*. *Journal of bacteriology*, 117(3):1002–1009, 1974.
- [6] Iwao Ohtsu, Yusuke Kawano, Marina Suzuki, Susumu Morigasaki, Kyohei Saiki, Shunsuke Yamazaki, Gen Nonaka, and Hiroshi Takagi. Uptake of L-cystine via an ABC transporter contributes defense of oxidative stress in the L-cystine export-dependent manner in *Escherichia coli*. *PLoS ONE*, 10(4):e0120619, 2015.
- [7] Robert Landick, Dale L Oxender, and Giovanna Ferro-Luzzi Ames. Bacterial amino acid transport systems. In *The Enzymes of Biological Membranes*, pages 577–615. Springer, 1985.
- [8] Sharon D Cosloy. D-serine transport system in *Escherichia coli* k-12. *Journal of bacteriology*, 114(2):679–684, 1973.
- [9] Matthias Quick and Jonathan A Javitch. Monitoring the function of membrane transport proteins in detergent-solubilized form. *Proceedings of the National Academy of Sciences*, 104(9):3603–3608, 2007.
- [10] Rishi Jain and Ranjan Srivastava. Metabolic investigation of host/pathogen interaction using MS2-infected *Escherichia coli*. *BMC Systems Biology*, 3(1):121, 2009.
- [11] Arvind Natarajan and Friedrich Srienc. Dynamics of glucose uptake by single *Escherichia coli* cells. *Metabolic Engineering*, 1(4):320–333, 1999.
- [12] Joseph Shiloach and Rephael Fass. Growing *E. coli* to high cell density—a historical perspective on method development. *Biotechnology Advances*, 23(5):345–357, 2005.
