# Supplementary material for: Modeling microbial cross-feeding at intermediate scale portrays community dynamics and species coexistence
Source: PubMed Central journal article supplement (PMC7480867; doi:10.1371/journal.pcbi.1008135), 2020-08-18
Supplement: pcbi.1008135.s015.pdf [file pcbi.1008135.s015.pdf]

| Parameter | Unit      | Value                 | Source   |
|-----------|-----------|-----------------------|----------|
| $\alpha$  | $\mu M$   | $3.00 \times 10^6$    | Ref. [1] |
| $k_{e,1}$ | $1/h$     | $1.20 \times 10^3$    |          |
| $k_{e,2}$ | $1/h$     | $7.56 \times 10^4$    | Ref. [1] |
| $m_{e,1}$ |           | 325                   | Ref. [2] |
| $m_{e,2}$ |           | 11738                 | Ref. [3] |
| $K_{m,s}$ | $\mu M$   | $1.00 \times 10^2$    |          |
| $K_{m,m}$ | $\mu M$   | $2.00 \times 10^1$    | Ref. [1] |
| $K_{i,r}$ | $\mu M$   | $6.00 \times 10^1$    |          |
| $k_r$     | $1/h$     | $3.60 \times 10^3$    | Ref. [1] |
| $d_r$     | $1/h$     | $1.26 \times 10^2$    | Ref. [1] |
| $Y_m$     | $1/\mu M$ | $3.33 \times 10^{-7}$ |          |
| $M_e$     | $\mu M$   | 0.00                  |          |
| $K_{i,a}$ | $\mu M$   | 1.00                  |          |

**Supplementary Table 4: Parameter values used in the simulation of the single-strain model.** Note that these values are specific to *E. coli*. The value of  $m_{e,2}$  was calculated by multiplying the literature value (7336 amino acids in ribosomal proteins) by a factor of 1.6 to account for tRNA-affiliated proteins. The yield coefficient of amino acid is the inverse of the total amino acid concentration of an *Escherichia coli* cell, i.e.,  $Y_m = 1/\alpha$ . By choosing  $M_e = 0$ , we assume that the metabolite released to the environment does not accumulate and can be quickly metabolized by other cell types.

## References

- [1] Allen G Marr. Growth rate of *Escherichia coli*. *Microbiol. Rev.*, 55(2):316–333, 1991.
- [2] Arijit Maitra and Ken A Dill. Bacterial growth laws reflect the evolutionary importance of energy efficiency. *Proc. Natl. Acad. Sci. USA*, 112(2):406–411, 2015.
- [3] Stefan Klumpp, Matthew Scott, Steen Pedersen, and Terence Hwa. Molecular crowding limits translation and cell growth. *Proc. Natl. Acad. Sci. USA*, 110(42):16754–16759, 2013.
